# Supplementary material for: Prothymosin α overexpression contributes to the development of pulmonary emphysema
Source: PubMed Central journal article supplement — Nat Commun. 2013 May 21;4:1906–. doi: 10.1038/ncomms2906 (PMC3674284; doi:10.1038/ncomms2906), 2013-05-21
Supplement: ncomms2906-s1.pdf [file ncomms2906-s1.pdf]

**SUPPLEMENTARY INFORMATION for**

**Prothymosin  $\alpha$  overexpression contributes to the development of pulmonary  
emphysema**

Bing-Hua Su, Yau-Lin Tseng, Gia-Shing Shieh, Yi-Cheng Chen, Ya-Chieh Shiang,

Pensee Wu, Kuo-Jung Li, Te-Hsin Yen, Ai-Li Shiau & Chao-Liang Wu

# Supplementary Figure S1

## Normal

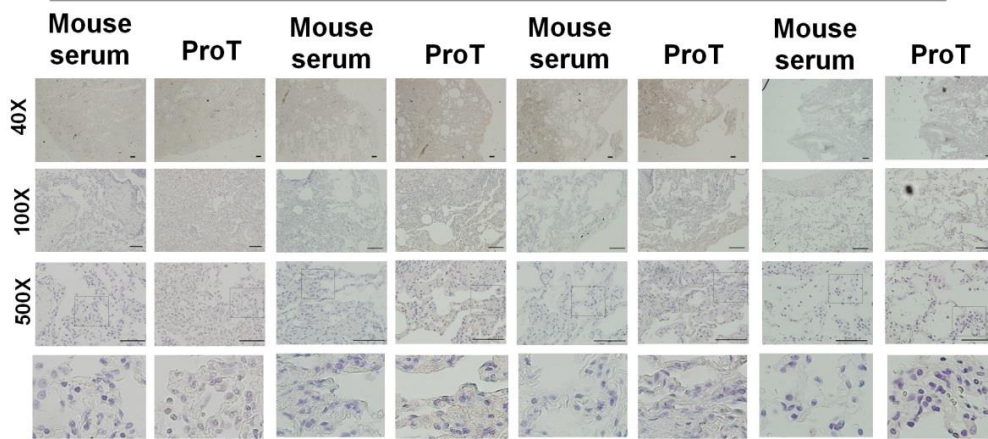

## Mild emphysema

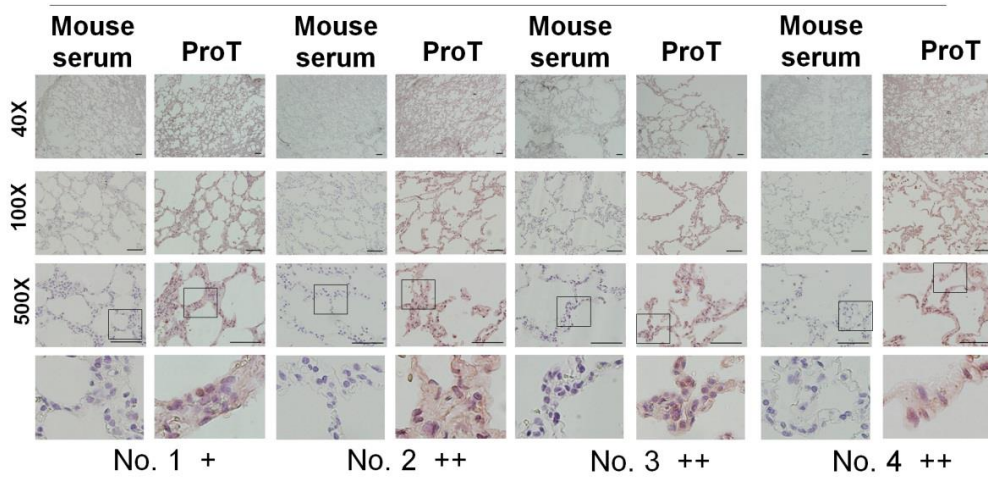

## Mild emphysema

## Moderate emphysema

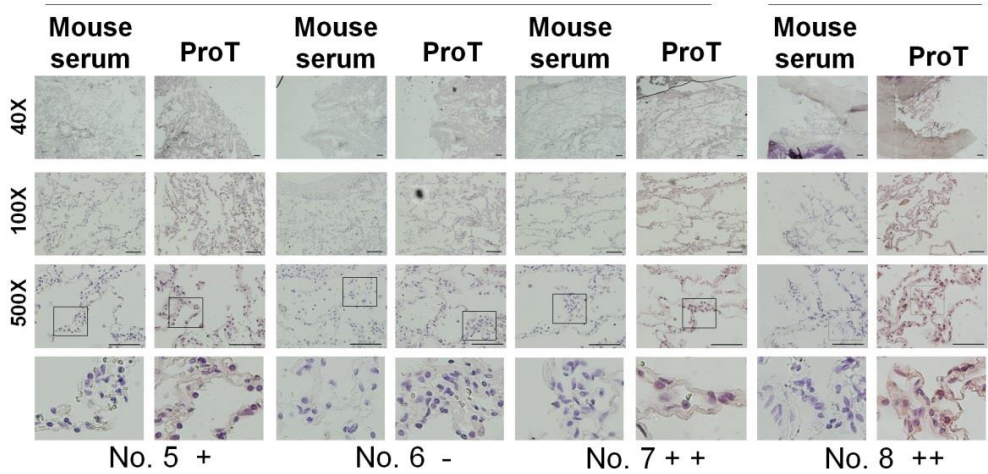

Supplementary Figure S1 continued

### Moderate emphysema

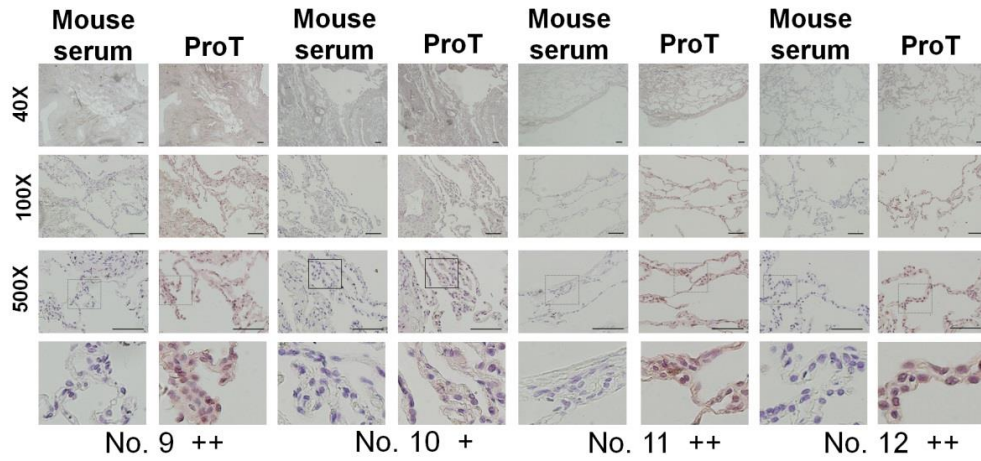

### Severe emphysema

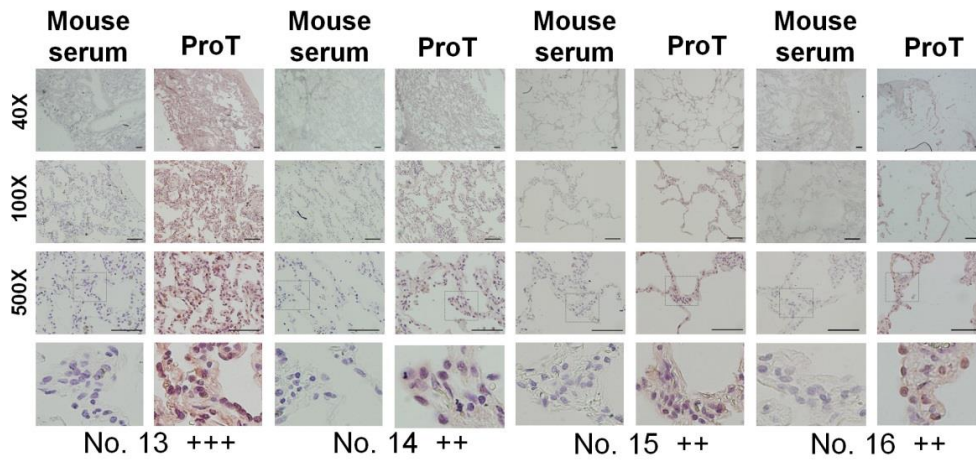

### Severe emphysema

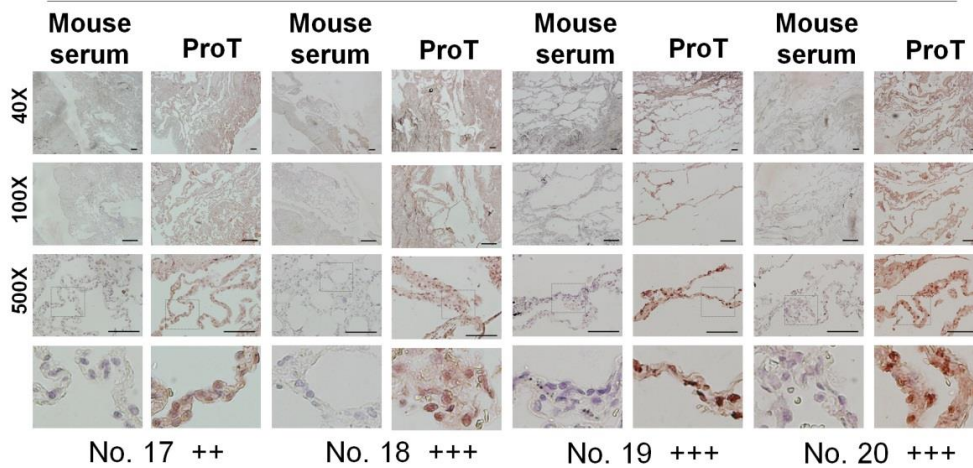

**Supplementary Figure S1. The expression levels of ProT in four non-emphysema individuals and 20 patients with mild, moderate or severe emphysema.** The immunohistochemical detection of ProT with anti-ProT monoclonal antibody or normal mouse serum for negative control staining in human emphysematous lung tissues of varying degrees of severity and in non-tumour (grossly normal) lung tissues obtained from patients with lung cancer. The tissue sections from the emphysema patients revealed airspace enlargement. Immunohistochemistry for ProT was performed and the immunoreactive intensity was quantitatively analysed by MetaMorph software. In each analysis, three randomly selected fields (500×) within the same tissue section were examined. Scale bars shown on 40×, 100× and 500× images correspond to 100 μm, 200 μm and 50 μm, respectively, and the boxed areas on 500× images are magnified below each panel. The cells stained positively for ProT in the emphysematous specimens are defined as those with immunoreactive signals equal to or greater than 2 times the mean signal from the normal specimens. The expression of ProT is classified as follows: positive staining in <10% of cells, (-); 10% to <30%, (+); 30% to <60%, (++);  $\geq$ 60%, (+++).

## Supplementary Figure S2

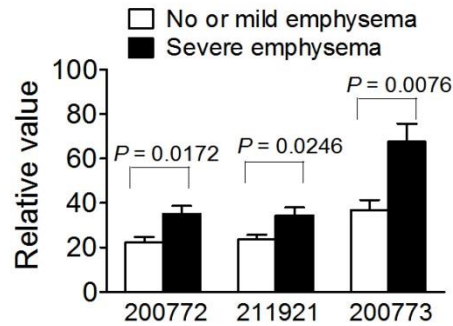

**Supplementary Figure S2. The levels of ProT transcripts are higher in the lung tissues of smokers with severe emphysema than in those with mild emphysema or without disease.** The microarray data (GEO accession number GPL96, DataSet Record GDS737, Affymetrix Human Genome U133A Array) from the Gene Expression Omnibus (GEO, NCBI) were analysed. The record includes data for comparison of the lung tissues from smokers with severe emphysema (removed at the time of lung volume reduction surgery) and smokers with mild or no emphysema. Accession numbers 200772 (BF686442), 211921(AF348514) and 200773 (NM\_002823) correspond to the ProT gene. Because the level of lung-specific surfactant protein C (SP-C, pulmonary-associated protein C) is not altered in COPD<sup>61</sup>, the expression level of ProT mRNA was normalised with that of surfactant protein C (SFTPC, accession number 38691). Note that the levels of ProT mRNA were significantly increased in severely emphysematous lung tissues ( $n=18$ ) as compared with those in normal or mildly emphysematous lung tissues ( $n=12$ ) from smokers. Values shown are the mean $\pm$ s.e.m. (Student's *t*-test).

### Supplementary Figure S3

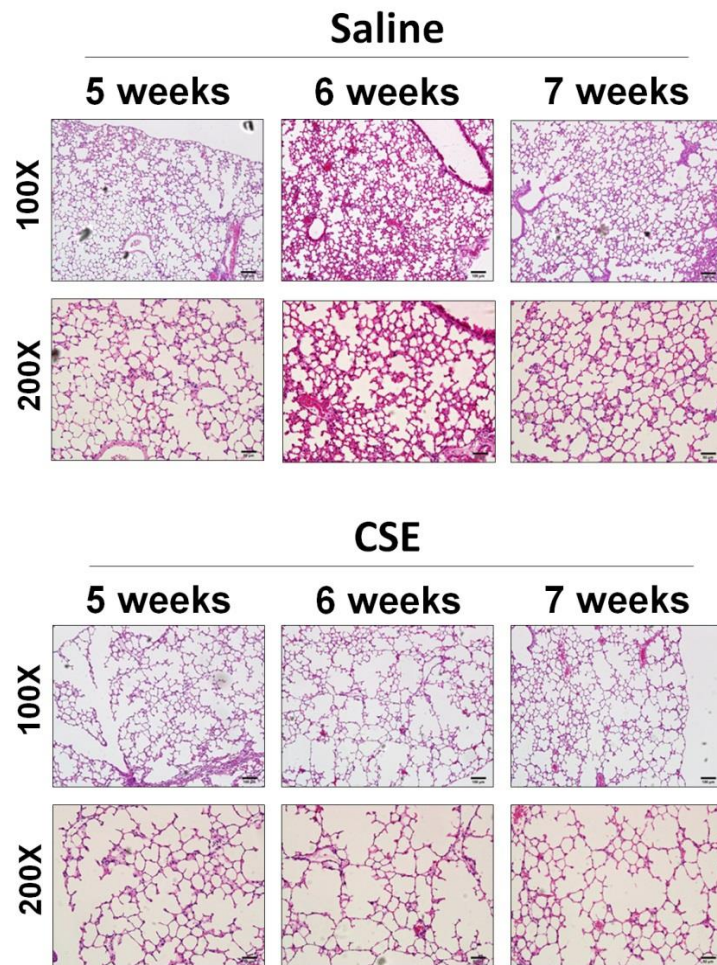

**Supplementary Figure S3. Establishment of a cigarette smoke extract (CSE)-induced emphysema model in FVB mice.** Six-week-old FVB male mice were intraperitoneally injected with CSE or PBS saline twice a week for 5, 6 or 7 weeks. Subsequently, the mice were sacrificed and their lung tissue sections were subjected to H&E staining for evaluating the severity of emphysema. Note that mice treated with CSE displayed alveolar airspace enlargement compared to those treated with PBS saline. Scale bars on 100 $\times$  and 200 $\times$  images correspond to 100  $\mu$ m and 50  $\mu$ m, respectively

Supplementary Figure S4

Normal

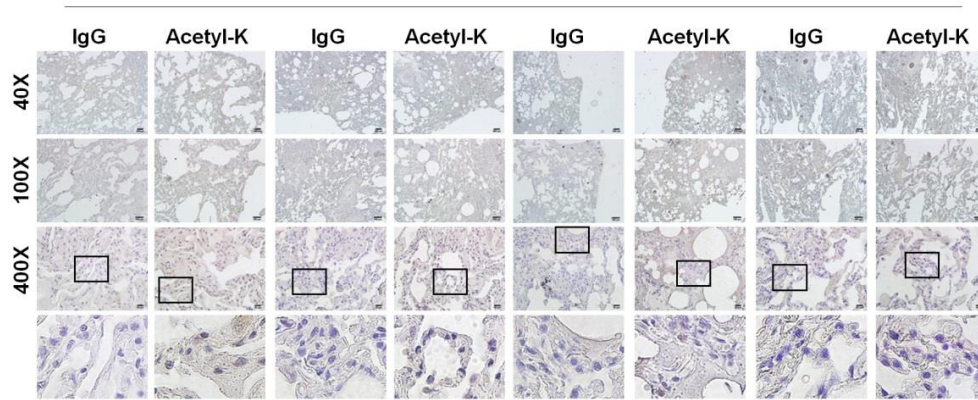

Mild emphysema

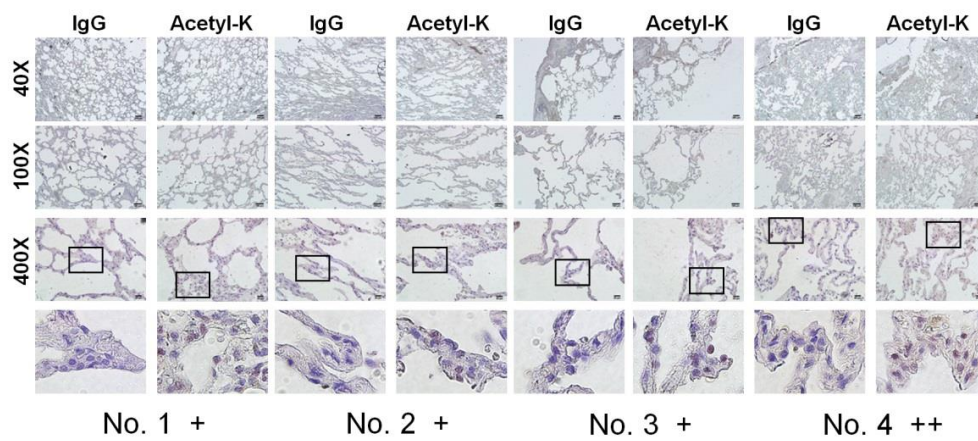

Mild emphysema

Moderate emphysema

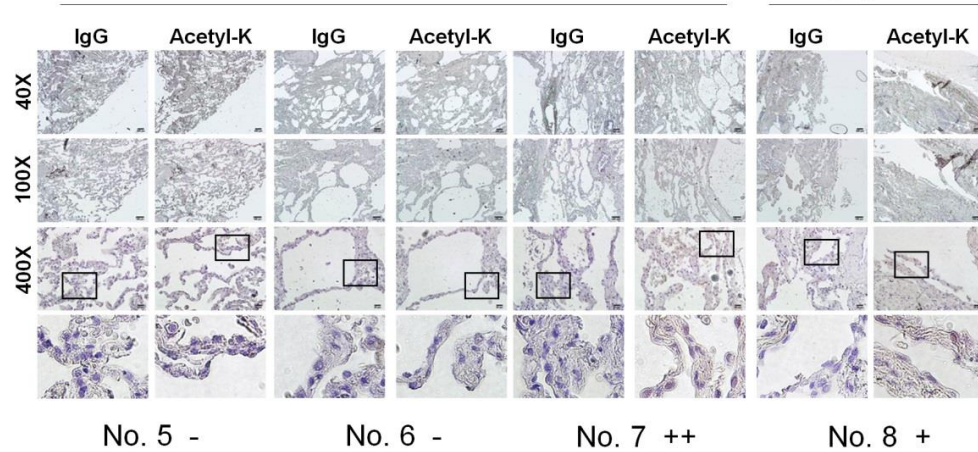

Supplementary Figure S4 continued

### Moderate emphysema

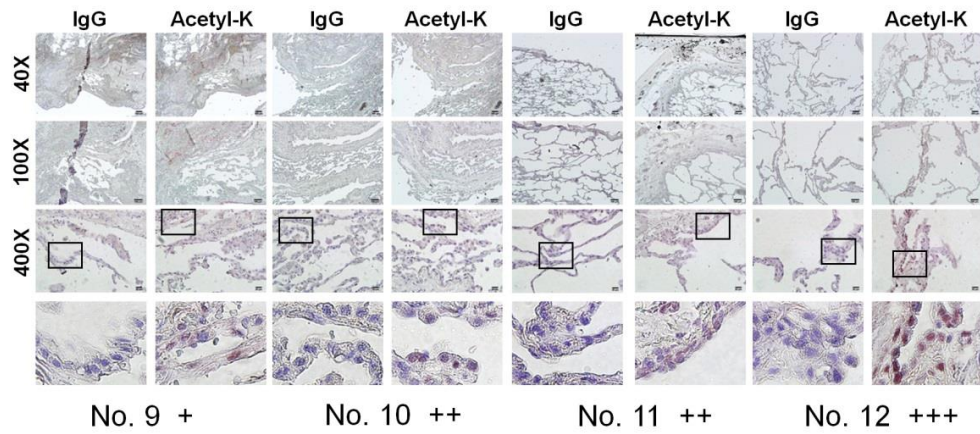

### Severe emphysema

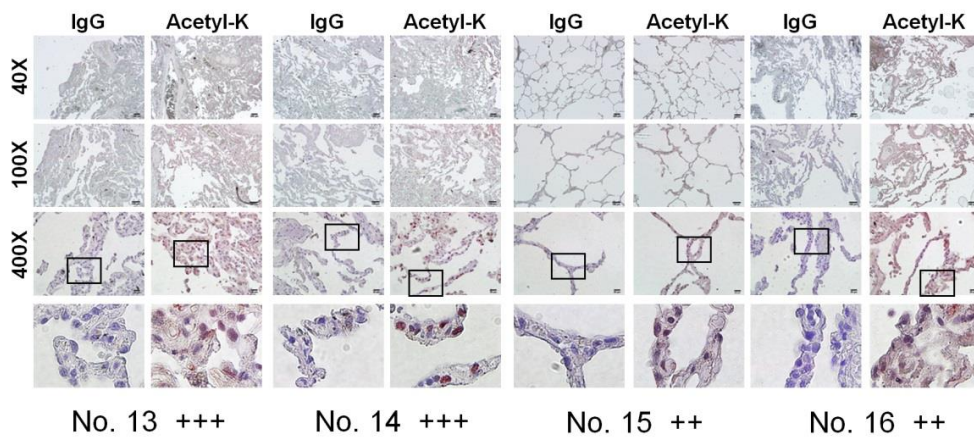

### Severe emphysema

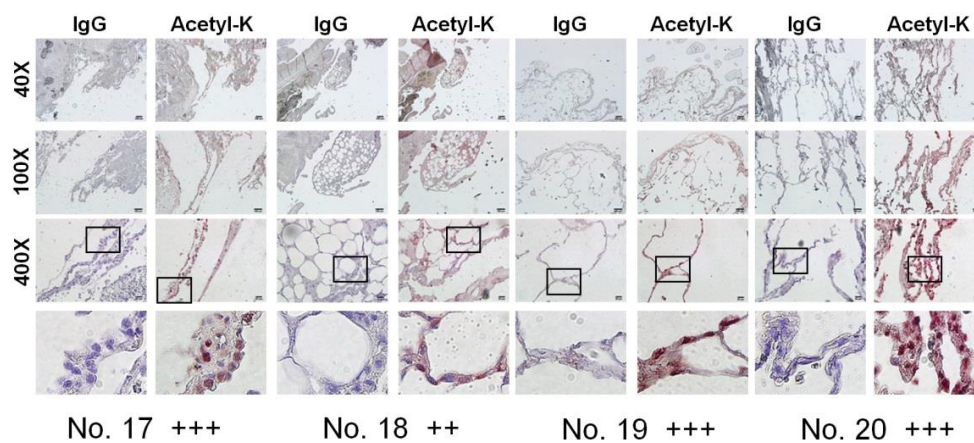



**Supplementary Figure S4. The levels of acetyl-K in four non-emphysema individuals and 20 patients with mild, moderate or severe emphysema.** The immunohistochemical detection of acetyl-K with anti-acetyl-K polyclonal antibody or control IgG for negative control staining in human emphysematous lung tissues of varying severity and in non-tumour (grossly normal) lung tissues obtained from patients with lung cancer. Immunohistochemistry for acetyl-K was performed and the immunoreactive intensity was quantitatively analysed by MetaMorph software. In each analysis, three randomly selected fields (400×) within the same tissue section were examined. The cells stained positively for acetyl-K in the emphysematous specimens are defined as those with immunoreactive signals equal to or greater than 2 times the mean signal from the normal specimens. The expression of acetyl-K is classified as follows: positive staining in <10% of cells, (-); 10% to <30%, (+); 30% to <60%, (++);  $\geq 60\%$ , (+++). Note that tissue sections from emphysema patients revealed acetyl-K accumulation. Scale bars shown on 40×, 100× and 400× images correspond to 200  $\mu\text{m}$ , 100  $\mu\text{m}$  and 20  $\mu\text{m}$ , respectively, and the boxed areas on 400× images are magnified below each panel.

## Supplementary Figure S5

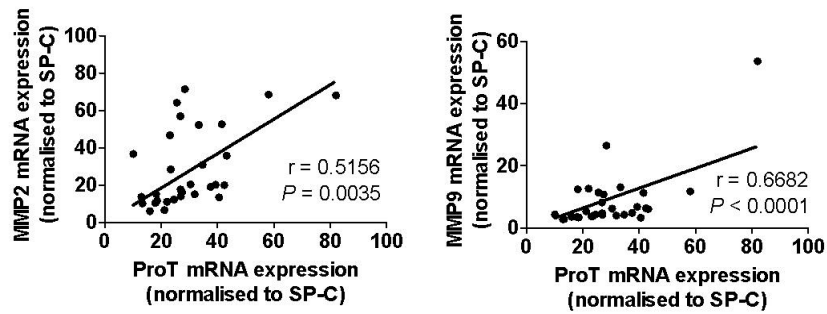

**Supplementary Figure S5. Positive correlations between ProT and MMP2 expressions as well as between ProT and MMP9 expressions in the lung tissues from smokers with varying degrees of emphysema.** The microarray data used for analysis were described in Fig. S2. Accession numbers 200772 (BF686442), 211921(AF348514) and 200773 (NM\_002823) correspond to the ProT gene. Accession numbers 201069 and 203936 correspond to the *MMP2* and *MMP9* gene, respectively. Correlations were measured using Pearson's correlation coefficient.

# Supplementary Figure S6

**Fig. 3c**

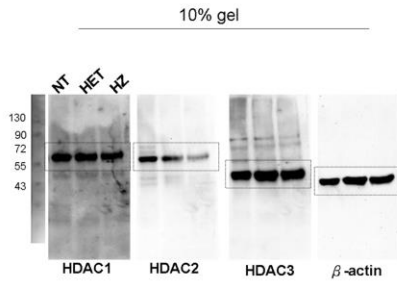

**Fig. 3d**

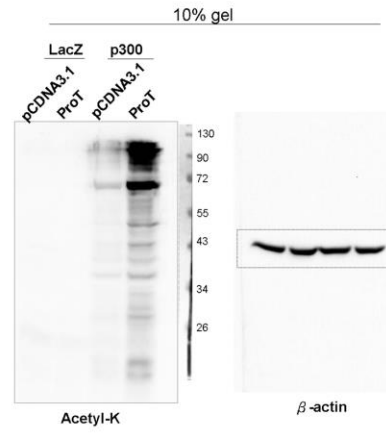

**Fig. 3d**

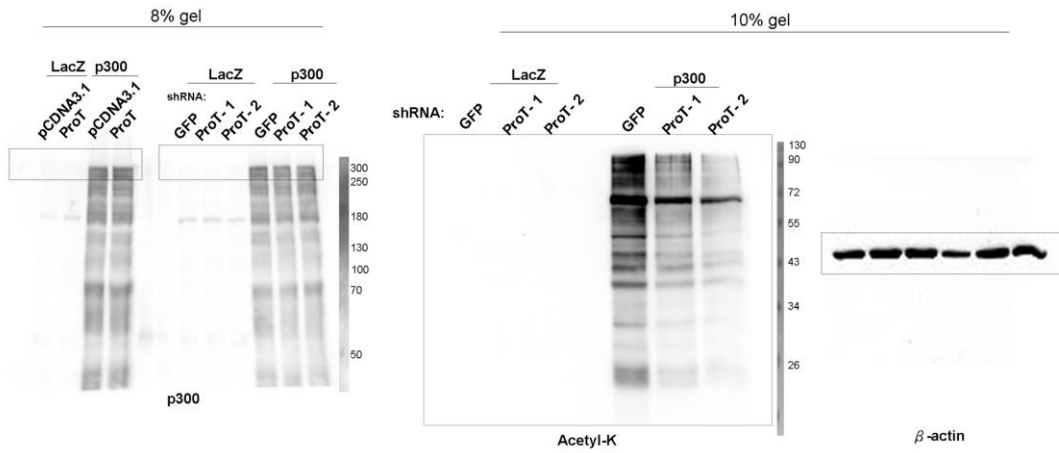

**Fig. 3e**

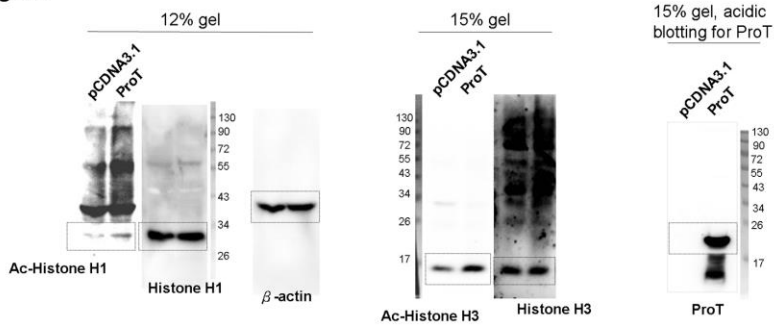

**Fig. 3f (left)**

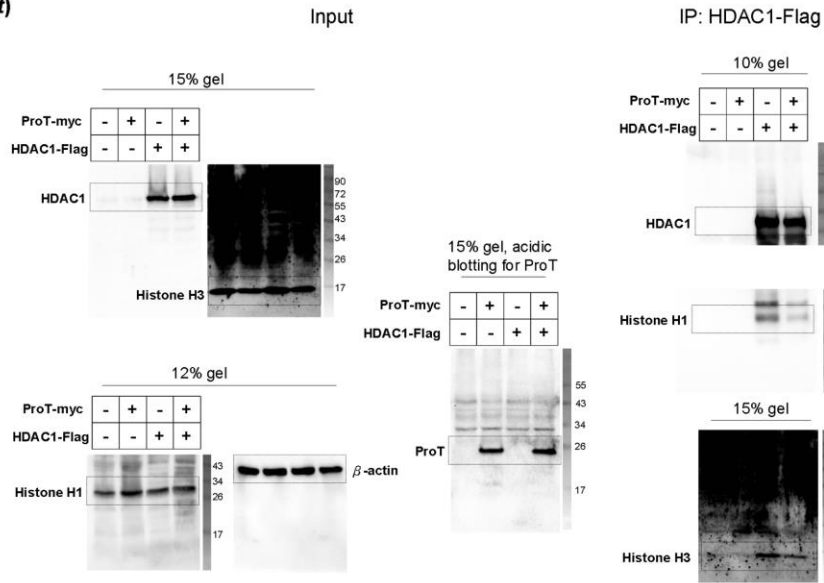

**Fig. 3f (right)**

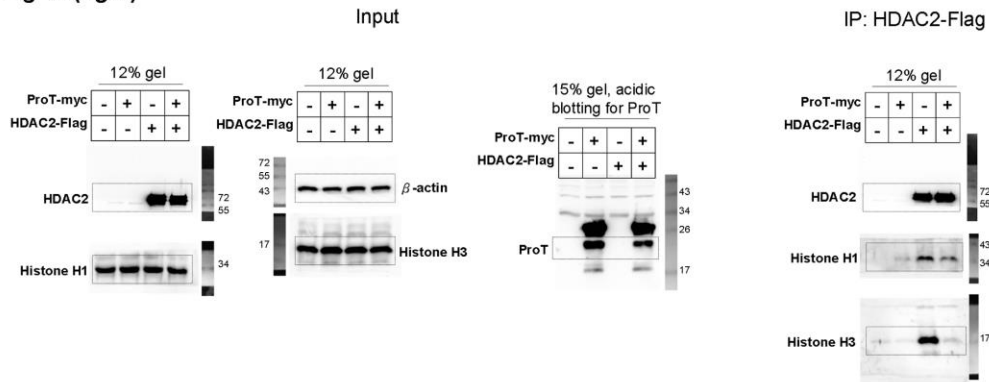

**Fig. 5a**

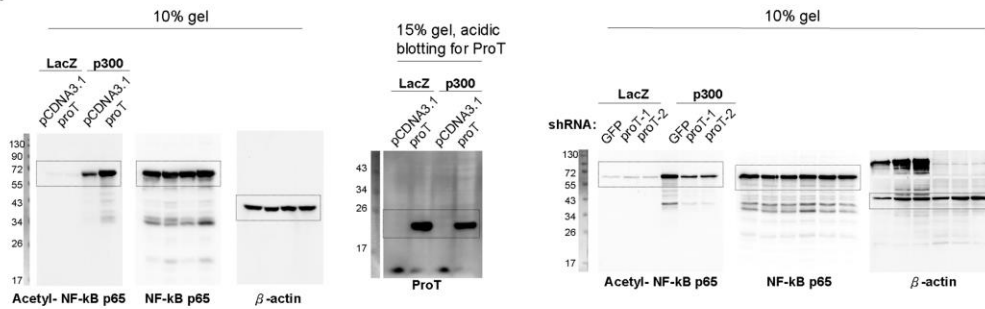

Full-length images of immunblots.#

**Fig. 5c**

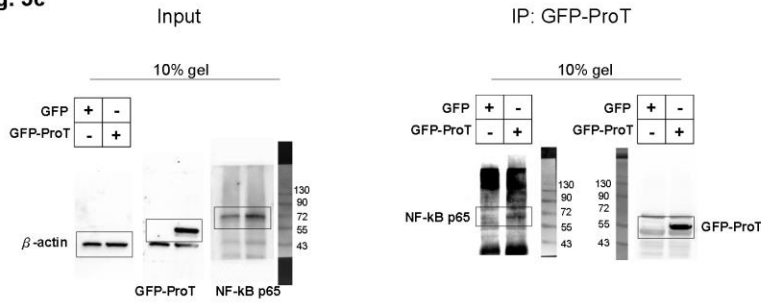

**Fig. 5d (left)**

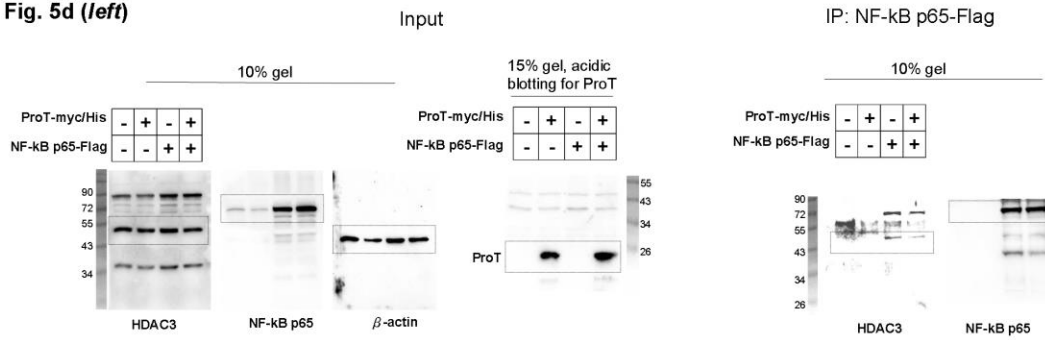

**Fig. 5d (right)**

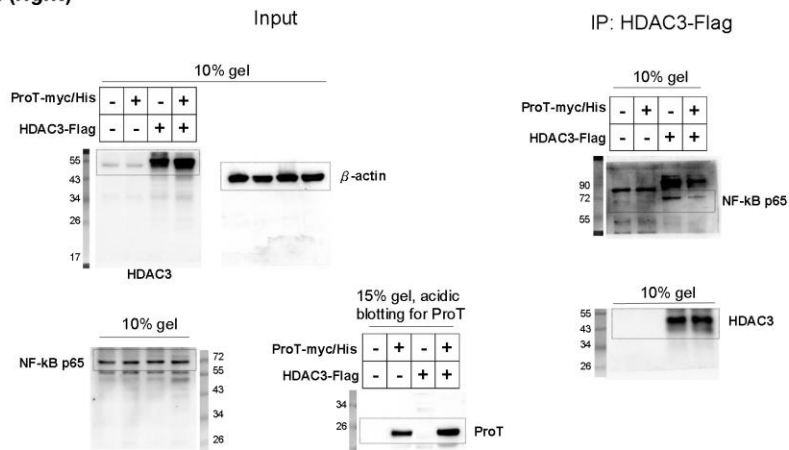

**Fig. 5e**

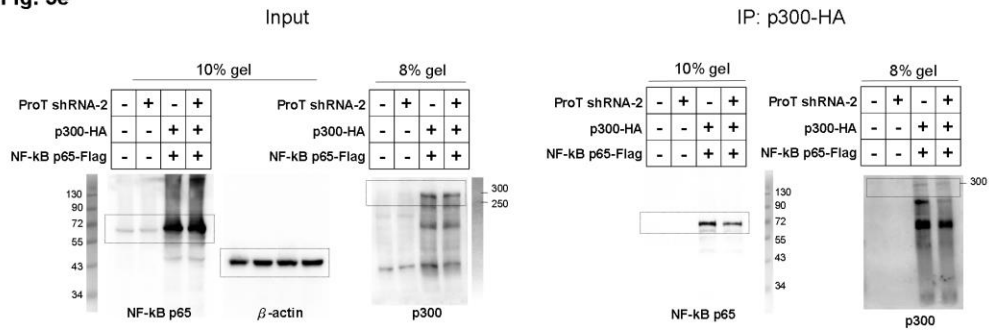

**Supplementary Table S1. The clinical characteristics of COPD patients.**

| Patient number | Age/Sex | Smoking | Severity (by PFT)        | CT findings (type of emphysema) | Presentation for surgery    | Surgical procedures | Treatment before surgery             | IHC for ProT |
|----------------|---------|---------|--------------------------|---------------------------------|-----------------------------|---------------------|--------------------------------------|--------------|
| 1              | 32/M    | No      | Mild<br>FEV1: 88%        | Paraseptal                      | Chest pain and pneumothorax | Wedge resection (V) | None                                 | +            |
| 2              | 34/M    | No      | Mild<br>FEV1: 89%        | Paraseptal                      | Chest pain and pneumothorax | Wedge resection (V) | None                                 | ++           |
| 3              | 61/M    | Yes     | Mild<br>FEV1: 86%        | Paraseptal                      | Chest pain and pneumothorax | Wedge resection (V) | None                                 | ++           |
| 4              | 48/M    | No      | Mild<br>FEV1: 85%        | Paraseptal                      | Chest pain and pneumothorax | Wedge resection (V) | None                                 | ++           |
| 5              | 66/M    | Yes     | Mild<br>FEV1: 80%        | Paraseptal                      | Chest pain and pneumothorax | Wedge resection (T) | None                                 | +            |
| 6              | 55/M    | Yes     | Mild<br>FEV1: 83%        | Paraseptal & centrilobular      | Chest pain and pneumothorax | Wedge resection (T) | None                                 | -            |
| 7              | 40/M    | Yes     | Mild<br>FEV1: 80%        | Paraseptal                      | Chest pain and pneumothorax | Wedge resection (V) | None                                 | ++           |
| 8              | 49/M    | Yes     | Moderate<br>FEV1: 69%    | Paraseptal & centrilobular      | Dyspnea and pneumothorax    | Wedge resection (V) | Bronchodilators                      | ++           |
| 9              | 65/M    | Yes     | Moderate<br>FEV1: 55%    | Paraseptal & centrilobular      | Dyspnea and pneumothorax    | Wedge resection (T) | Bronchodilators                      | ++           |
| 10             | 80/M    | Yes     | Moderate<br>FEV1: 54%    | Paraseptal & centrilobular      | Dyspnea and pneumothorax    | Wedge resection (T) | Bronchodilators                      | +            |
| 11             | 41/F    | No      | Moderate<br>FEV1: 72%    | Paraseptal & centrilobular      | Chest pain and pneumothorax | Wedge resection (V) | None                                 | ++           |
| 12             | 39/M    | Yes     | Moderate<br>FEV1: 74%    | Paraseptal & centrilobular      | Chest pain and pneumothorax | Wedge resection (V) | None                                 | ++           |
| 13             | 50/M    | Yes     | Severe<br>FEV1: 32%      | Panlobular                      | Dyspnea                     | Bilateral LVRS      | Inhaled steroids and bronchodilators | +++          |
| 14             | 59/M    | Yes     | Very severe<br>FEV1: 18% | Panlobular                      | Dyspnea and pneumothorax    | Wedge resection (V) | Inhaled steroids and bronchodilators | ++           |
| 15             | 77/M    | Yes     | Severe<br>FEV1: 45%      | Panlobular                      | Dyspnea and pneumothorax    | Wedge resection (V) | Inhaled steroids and bronchodilators | ++           |
| 16             | 56/M    | Yes     | Very severe<br>FEV1: 13% | Panlobular                      | Dyspnea                     | Bilateral LVRS      | Inhaled steroids and bronchodilators | ++           |

|    |      |     |                          |            |         |                         |                                         |     |
|----|------|-----|--------------------------|------------|---------|-------------------------|-----------------------------------------|-----|
| 17 | 82/M | Yes | Very severe<br>FEV1: 28% | Panlobular | Dyspnea | Bilateral<br>LVRS       | Inhaled steroids and<br>bronchodilators | ++  |
| 18 | 55/M | Yes | Very severe<br>FEV1: 25% | Panlobular | Dyspnea | Lung<br>transplantation | Inhaled steroids and<br>bronchodilators | +++ |
| 19 | 54/M | No  | Very severe<br>FEV1: 16% | Panlobular | Dyspnea | Lung<br>transplantation | Inhaled steroids and<br>bronchodilators | +++ |
| 20 | 66/M | Yes | Very severe<br>FEV1: 11% | Panlobular | Dyspnea | Lung<br>transplantation | Inhaled steroids and<br>bronchodilators | +++ |

All patients were diagnosed with emphysema by pulmonary function test results, CT scans and pathological reports from resected lung specimens. The severity was classified according to the Global Initiative on Obstructive Lung Disease (GOLD) emphysema staging system. All patients had FEV1/FEV (percent forced expiratory volume in one second) less than 70%. Immunohistochemistry (IHC) for ProT was performed and the immunoreactive intensity was quantitatively analysed by MetaMorph software. In each analysis, three randomly selected fields (500×) within the same tissue section were examined. The cells stained positively for ProT in the emphysematous specimens are defined as those with immunoreactive signals equal to or greater than 2 times the mean signal from the normal specimens. The expression of ProT is classified as follows: positive staining in <10% of cells, (-); 10% to <30%, (+); 30% to <60%, (++);  $\geq$  60%, (+++). PFT, pulmonary function test; V, video-assisted thoracoscopic surgery; T, thoracotomy; LVRS, lung volume reduction surgery.

### Supplementary Reference

61. Ohlmeier, S. *et al.* Proteomics of human lung tissue identifies surfactant protein A as a marker of chronic obstructive pulmonary disease. *J Proteome Res* **7**, 5125-5132 (2008).
